# Supplementary material for: From river mouth to reef: benthic foraminifera assemblages reveal ecological dynamics in a mixed carbonate–siliciclastic Brazilian continental shelf
Source: Copernicus journal article supplement (doi:10.5194/jm-44-633-2025), 2025-12-08
Supplement: Supplementary file 1 [file Supplementary_Material-1.xlsx]

## Sheet: TABLE I
Shelf	Station	Latitude	Longitude	Depth (m)
Paleovalley	A01	21° 02′ 45.81″ S	40° 32′ 29.21″ W	24
	A02	21° 03′ 31.13″ S	40° 22′ 59.88″ W	40
	A03	21° 04′ 01.29″ S	40° 18′ 50.11″ W	50
	A04	21° 04′ 04.56″ S	40° 14′ 14.08″ W	150
	B01	20° 34′ 34.37″ S	40° 20′ 50.77″ W	25
	B02	20° 34′ 47.13″ S	40° 11′ 31.10″ W	41
	B03	20° 34′ 53.05″ S	40° 06′ 27.68″ W	50
	B04	20° 35′ 23.09″ S	39° 55′ 01.18″ W	157
	C01	20° 10′ 02.67″ S	40° 08′ 31.96″ W	26
	C02	20° 11′ 25.75″ S	40° 02′ 15.87″ W	39
	C03	20° 12′ 21.46″ S	39° 58′ 00.30″ W	50
Doce River	FOZ03	19° 42′ 08.87″ S	39° 49′ 29.72″ W	16
	FOZ08	19° 44′ 44.06″ S	39° 46′ 32.01″ W	31
	FOZ13	19° 47′ 22.52″ S	39° 43′ 20.72″ W	41
	FOZ18	19° 50′ 16.39″ S	39° 40′ 11.23″ W	53
	D01	19° 35′ 35.96″ S	39° 41′ 20.60″ W	26
	D02	19° 40′ 25.29″ S	39° 36′ 21.96″ W	40
	D03	19° 43′ 14.33″ S	39° 34′ 34.78″ W	50
	D04	19° 45′ 53.43″ S	39° 30′ 25.97″ W	144
Abrolhos	E01	19° 09′ 51.36″ S	39° 29′ 20.53″ W	26
	E02	19° 18′ 06.12″ S	39° 23′ 23.35″ W	33
	E03	19° 26′ 04.81″ S	39° 17′ 38.64″ W	50
	E04	19° 36′ 03.57″ S	39° 10′ 33.64″ W	151
	F01	18° 42′ 54.91″ S	39° 31′ 28.99″ W	25
	F02	18° 52′ 31.35″ S	39° 08′ 41.34″ W	40
	F03	18° 53′ 31.97″ S	39° 06′ 21.78″ W	52
	F04	19° 33′ 02.92″ S	38° 42′ 52.26″ W	146
	G01	18° 32′ 03.21″ S	39° 23′ 17.35″ W	25
	G02	18° 36′ 32.45″ S	39° 09′ 32.83″ W	39
	G03	18° 40′ 57.41″ S	38° 55′ 39.92″ W	55

## Sheet: TABLE II
Shelf		Depth (m)	Gravel (%)	Sand (%)	Mud (%)	%OM	%CaCO₃
Paleovalley	A01	24	10	81	9	3	97
	A02	40	19	67	14	10	69
	A03	50	13	44	43	8	77
	A04	150	0	77	23	12	67
	B01	25	0	52	48	7	85
	B02	41	19	66	15	10	69
	B03	50	12	68	20	6	81
	B04	157	0	77	23	7	72
	C01	26	14	83	3	5	63
	C02	39	6	70	24	9	62
	C03	50	3	84	13	8	77
Doce River	FOZ03	16	0	4	96	17	8
	FOZ08	31	5	81	14	3	5
	FOZ13	41	0	98	2	1	1
	FOZ18	53	11	78	11	9	85
	D01	26	0	23	77	12	7
	D02	40	0	97	3	1	5
	D03	50	0	96	4	3	13
	D04	144	17	36	47	11	28
Abrolhos	E01	26	1	95	4	-	6
	E02	38	0	83	17	4	11
	E03	50	0	93	7	4	8
	E04	151	11	72	17	9	89
	F01	25	0	89	11	3	25
	F02	40	29	48	23	5	78
	F03	52	3	58	39	4	66
	F04	146	7	86	7	6	73
	G01	25	0	97	3	-	6
	G02	39	0	86	14	2	30
	G03	55	3	65	32	3	86

## Sheet: TABLE III
Taxonomic List - Benthic Foraminifera from Espirito Santo Continental Shelf (ESCS)
Taxon	Original name	Verified in CFC*	Microhabitat	Tests Types	SEM Image Sample
Alabaminella Saidova, 1975			Epifaunal	Hyaline
Allassoida schlumbergerii (Millett, 1900)	Bigenerina (Siphogenerina) schlumbergerii Millett, 1900		-	Hyaline
Alfredosilvestris pauciloculata (Cushman, 1917)	Nodosaria pauciloculata Cushman, 1917		Epi/Infaunal	Hyaline
Ammonia beccarii (Linnaeus, 1758)	Nautilus beccarii Linnaeus, 1758		Epi/Infaunal	Hyaline
Ammonia parkinsoniana (d'Orbigny, 1839)	Rosalina parkinsoniana d'Orbigny, 1839		Epi/Infaunal	Hyaline
Ammonia tepida (Cushman, 1926)	Rotalia beccarii var. tepida Cushman, 1926	Yes	Epi/Infaunal	Hyaline
Amphistegina gibbosa d'Orbigny, 1839		Yes	Epifaunal	Hyaline
Amphistegina lessoni d'Orbigny, 1830		Yes	Epifaunal	Hyaline
Amphistegina radiata (Fichtel & Moll, 1798)	Nautilus radiatus Fichtel & Moll, 1798	Yes	Epifaunal	Hyaline	C01
Amphycorina scalaris (Batsch, 1791)	Nautilus (Orthoceras) scalaris Batsch, 1791		Infaunal	Hyaline
Astacolus Montfort, 1808			Infaunal	Hyaline
Astrononion Cushman & Edwards, 1937			Epifaunal	Hyaline
Bolivina dilatata Reuss, 1850		Yes	Infaunal	Hyaline	F03
Bolivina doniezi Cushman & Wickenden, 1929			Infaunal	Hyaline
Bolivina fragilis Phleger & Parker, 1951		Yes	Infaunal	Hyaline	D04
Bolivina lowmani Phleger & Parker, 1951		Yes	Infaunal	Hyaline	A03
Bolivina paula Cushman & Cahill, 1932		Yes	Infaunal	Hyaline
Bolivina pseudoplicata Heron-Allen & Earland, 1930		Yes	Infaunal	Hyaline
Bolivina striatula Cushman, 1922			Infaunal	Hyaline
Bolivina subaenariensis Cushman, 1922			Infaunal	Hyaline
Bolivina supspinescens Cushman, 1922		Yes	Infaunal	Hyaline
Bolivina vadescens Cushman, 1933			Infaunal	Hyaline
Bolivinellina transluscens (Phleger & Parker, 1951)	Bolivina translucens Phleger & Parker, 1951	Yes	Infaunal	Hyaline
Borelis Montfort, 1808			Epifaunal	Hyaline
Buccella Andersen, 1952			Epifaunal	Hyaline
Bulimina aculeata Orbigny, 1826			Infaunal	Hyaline
Bulimina marginata Orbigny, 1826			Infaunal	Hyaline
Buliminella elegantissima (d'Orbigny, 1839)	Bulimina elegantissima d'Orbigny, 1839		Infaunal	Hyaline
Cancris auricula (Fichtel & Moll, 1798)	Nautilus auricula Fichtel & Moll, 1798		Epifaunal	Hyaline
Cancris oblongus (d'Orbigny, 1839)	Valvulina oblonga d'Orbigny, 1839		Epifaunal	Hyaline
Cassidulina curvata Phleger & Parker, 1951			Infaunal	Hyaline
Cassidulina laevigata Orbigny, 1826			Infaunal	Hyaline	B04
Cibicides aknerianus (d'Orbigny, 1846)	Rotalina akneriana d'Orbigny, 1846	Yes	Epifaunal	Hyaline	B04
Cibicides dispars (d'Orbigny, 1839)	Truncatulina dispars d'Orbigny, 1839		Epifaunal	Hyaline
Cibicides fletcheri Galloway & Wissler, 1927			Epifaunal	Hyaline	B04
Cibicides lobatulus (Walker & Jacob, 1798)	Echinus lobatulus Walker & Jacob, 1798	Yes	Epifaunal	Hyaline
Cibicides refulgens Montfort, 1808			Epifaunal	Hyaline
Cibicides variabilis (d'Orbigny, 1826)	Truncatulina variabilis d'Orbigny, 1826	Yes	Epifaunal	Hyaline
Cibicidoides cicatricosus (Schwager, 1866)	Anomalina cicatricosa Schwager, 1866	Yes	Epifaunal	Hyaline
Cibicidoides mundulus (Brady, Parker & Jones, 1888)	Truncatulina mundula Brady, Parker & Jones, 1888	Yes	Epifaunal	Hyaline	FOZ18
Cibicidoides wuellerstorfi (Schwager, 1866)	Anomalina wuellerstorfi Schwager, 1866	Yes	Epifaunal	Hyaline
Cribroelphidium gunteri (Cole, 1931)	Elphidium gunteri Cole, 1931		Infaunal	Hyaline
Cribroelphidium poyeanum (d'Orbigny, 1839)	Polystomella poeyana d'Orbigny, 1839	Yes	Infaunal	Hyaline
Cyclorbiculina compressa (d'Orbigny, 1839)	Orbiculina compressa d'Orbigny, 1839		Epifaunal	Hyaline
Cymbaloporreta atlantica (Cushman, 1934)	Tretomphalus atlanticus Cushman, 1934	Yes	Epifaunal	Hyaline
Discogypsina viscularis Silvestri, 1937			Epi/Infaunal	Hyaline
Discorbinella bertheloti (d'Orbigny, 1839)	Rosalina bertheloti d'Orbigny, 1839	Yes	Epifaunal	Hyaline
Discorbis bradyi Cushman, 1915	Rosalina bradyi Cushman, 1915		Epifaunal	Hyaline
Discorbis malovensis Heron-Allen & Earland, 1932			Epifaunal	Hyaline
Discorbis peruvianus (d'Orbigny, 1839)	Rosalina peruviana d'Orbigny, 1839		Epifaunal	Hyaline
Discorbis valvulatus (d'Orbigny, 1839)	Rosalina valvulata d'Orbigny, 1839		Epifaunal	Hyaline
Discorbis vilardeboeanus (d'Orbigny, 1839)	Rosalina vilardeboana d'Orbigny, 1839	Yes	Epifaunal	Hyaline	A02
Discorbis williamsoni Chapman & Parr, 1932			Epifaunal	Hyaline
Ehrenbergina spinea Cushman, 1935			Infaunal	Hyaline
Elongobula arethusae Revets, 1993			Infaunal	Hyaline
Elphidium advena (Cushman, 1922)	Polystomella advena Cushman, 1922		Epifaunal	Hyaline
Elphidium discoidale (d'Orbigny, 1839)	Polystomella discoidalis d'Orbigny, 1839	Yes	Infaunal	Hyaline	D01
Elphidium excavatum (Terquem, 1875)	Polystomella excavata Terquem, 1875	Yes	Infaunal	Hyaline
Elphidium galvestonense Kornfeld, 1931	Elphidium gunteri var. galvestonensis Kornfeld, 1931		Epifaunal	Hyaline
Elphidium macellum (Fichtel & Moll, 1798)	Nautilus macellus Fichtel & Moll, 1798		Epifaunal	Hyaline
Epistominella exigua (Brady, 1884)	Pulvinulina exigua Brady, 1884	Yes	Epifaunal	Hyaline
Eponides cribrorepandus (Asano & Uchio, 1951)	Poroeponides cribrorepandus Asano & Uchio, 1951	Yes	Epifaunal	Hyaline	A01
Eponides repandus (Fichtel & Moll, 1798)	Nautilus repandus Fichtel & Moll, 1798	Yes	Epifaunal	Hyaline
Evolvocassidulina Eade, 1967			Infaunal	Hyaline
Floresina Revets, 1990			Epifaunal	Hyaline
Fursenkoina pantoni (Cushman, 1932)	Virgulina pontoni Cushman, 1932		Infaunal	Hyaline
Gavelinopsis praegeri (Heron-Allen & Earland, 1913)	Discorbina praegeri Heron-Allen & Earland, 1913		Epifaunal	Hyaline
Glabratellina traphera Loeblich & Tappan, 1994			-	Hyaline
Glandulina Orbigny, 1839			Infaunal	Hyaline
Glandulonodosaria Silvestri, 1900			-	Hyaline
Globobulimina pacifica Cushman, 1927			Infaunal	Hyaline
Globocassidulina crassa (d’Orbigny, 1839)	Cassidulina crassa d’Orbigny, 1839	Yes	Infaunal	Hyaline	F04
Globocassidulina oblonga (Reuss, 1850)	Cassidulina oblonga Reuss, 1850	Yes	Infaunal	Hyaline
Globocassidulina rossensis Kennett, 1967	Globocassidulina crassa subsp. rossensis Kennett, 1967	Yes	Infaunal	Hyaline
Globocassidulina subglobosa (Brady, 1881)	Cassidulina subglobosa Brady, 1881	Yes	Infaunal	Hyaline	F04
Guttulina Orbigny, 1839			Infaunal	Hyaline
Gypsina vesicularis (Parker & Jones, 1860)	Orbitolina concava var. vesicularis Parker & Jones, 1860		-	Hyaline
Gyroidina Orbigny, 1826			Epifaunal	Hyaline
Gyroidinoides Brotzen, 1942			Epifaunal	Hyaline
Hanzawaia boueana (d’Orbigny, 1846)	Truncatulina boueana d’Orbigny, 1846	Yes	Infaunal	Hyaline	F04
Haynesina germanica (Ehrenberg, 1840)	Nonionina germanica Ehrenberg, 1840		Infaunal	Hyaline
Heterolepa bradyi (Trauth, 1918)	Truncatulina bradyi Trauth, 1918	Yes	Epifaunal	Hyaline
Heterostegina depressa Orbigny, 1826			Epifaunal	Hyaline
Hoeglundina elegans (d'Orbigny, 1826)	Rotalia (Turbinuline) elegans d'Orbigny, 1826		Infaunal	Hyaline
Hopinkisina pacifica Cushman, 1933			Infaunal	Hyaline
Ioanella tumidula (Brady, 1884)	Truncatulina tumidula Brady, 1884		Epifaunal	Hyaline
Islandiella australis (Phleger & Parker, 1951)	Cassidulina australis Phleger & Parker, 1951	Yes	Infaunal	Hyaline
Laevidentalina Loeblich & Tappan, 1986			Epi/Infaunal	Hyaline
Lenticulina atlantica (Barker, 1960)	Robulus atlanticus Barker, 1960	Yes	Infaunal	Hyaline
Lenticulina convergens (Bornemann, 1855)	Cristellaria convergens Bornemann, 1855		Infaunal	Hyaline
Lenticulina gibba (d'Orbigny, 1839)	Cristellaria gibba d'Orbigny, 1839		Infaunal	Hyaline
Lenticulina orbicularis (d'Orbigny, 1826)	Robulina orbicularis d'Orbigny, 1826	Yes	Infaunal	Hyaline
Lenticulina stephensoni (Cushman, 1939)	Robulus stephensoni Cushman, 1939	Yes	Infaunal	Hyaline	G02
Lenticulina vortex (Fichtel & Moll, 1798)	Nautilus vortex Fichtel & Moll, 1798	Yes	Infaunal	Hyaline
Lingulina d'Orbigny, 1826			Infaunal	Hyaline
Lobatula lobatula (Walker & Jacob, 1798)	Nautilus lobatulus Walker & Jacob, 1798		Epifaunal	Hyaline
Loxostomum Ehrenberg, 1854			Infaunal	Hyaline
Marginulina d'Orbigny, 1826			Infaunal	Hyaline
Melonis barleeanum (Williamson, 1858)	Nonionina barleeana Williamson, 1858		Infaunal	Hyaline
Neoconorbina terquemi (Rzehak, 1888)	Discorbina terquemi Rzehak, 1888		Epifaunal	Hyaline
Neoeponides antillarum (d'Orbigny, 1839)	Rotalina (Rotalina) antillarum d'Orbigny, 1839	Yes	Epifaunal	Hyaline	A03
Neoeponides scheiberssi (d'Orbigny, 1846)	Rotalina schreibersii d'Orbigny, 1846		Epifaunal	Hyaline
Neolenticulina McCulloch, 1977			Infaunal	Hyaline
Nonionella atlantica Cushman, 1947			Infaunal	Hyaline
Nonionella auris (d'Orbigny, 1839)	Valvulina auris d'Orbigny, 1839		Infaunal	Hyaline
Nonionella opima Cushman, 1947			Infaunal	Hyaline
Nonionoides grateloupii (d'Orbigny, 1839)	Nonionina grateloupii d'Orbigny, 1839		Infaunal	Hyaline
Oridorsalis umbonatus (Reuss, 1851)	Rotalina umbonata Reuss, 1851	Yes	Epifaunal	Hyaline
Paracassidulina nipponensis (Eade, 1969)	Globocassidulina nipponensis Eade, 1969	Yes	Infaunal	Hyaline	FOZ18
Pararotalia cananeiaensis Debenay, Duleba, Bonetti, Souza & Eichler, 2001			Epifaunal	Hyaline
Patellina corrugata Williamson, 1858			Epifaunal	Hyaline
Planispirinella exigua (Brady, 1879)	Hauerina exigua Brady, 1879		Epifaunal	Hyaline
Planodiscorbis rarescens (Brady, 1884)	Discorbina rarescens Brady, 1884		Epifaunal	Hyaline
Planoglabratella Seiglie & Bermudez, 1965			Epifaunal	Hyaline
Planorbulina mediterranensis d'Orbigny, 1926		Yes	Epifaunal	Hyaline
Planorbulinella Cushman, 1927			-	Hyaline
Planulina ariminensis d'Orbigny, 1826		Yes	Epifaunal	Hyaline
Planulina foveolata (Brady, 1884)	Anomalina foveolata Brady, 1884	Yes	Epifaunal	Hyaline	F04
Pleurostomella Reuss, 1860			Infaunal	Hyaline
Poroeponides laterialis (Terquem, 1878)	Rosalina lateralis Terquem, 1878	Yes	Epifaunal	Hyaline
Pseudobrizalina lobata (Brady, 1881)	Bulimina (Bolivina) lobata Brady, 1881		Infaunal	Hyaline
Pullenia bulloides (d'Orbigny, 1846)	Nonionina bulloides d'Orbigny, 1846		Infaunal	Hyaline
Pullenia quinqueloba (Reuss, 1851)	Nonionina quinqueloba Reuss, 1851		Infaunal	Hyaline
Pyrulina gutta (d'Orbigny, 1826)	Polymorphina (Pyruline) gutta d'Orbigny, 1826		Infaunal	Hyaline
Rectobolivina bifrons (Brady, 1881)	Uvigerina (Sagrina) bifrons Brady, 1881		Infaunal	Hyaline
Rectouvigerina Mathews, 1945			Infaunal	Hyaline
Reussella spinulosa (Reuss, 1850)	Verneuilina spinulosa Reuss, 1850	Yes	Infaunal	Hyaline
Rosalina globularis d’Orbigny, 1826		Yes	Epifaunal	Hyaline	A01
Rotorbinella lepida McCulloch, 1977		Yes	Epifaunal	Hyaline
Rotorbis auberii (d'Orbigny, 1839)	Rosalina auberii d'Orbigny, 1839		-	Hyaline
Rutherfordoides McCulloch, 1981			Infaunal	Hyaline
Sagrina pulchella d'Orbigny, 1939		Yes	Infaunal	Hyaline
Seabrookia curta McCulloch, 1977			Infaunal	Hyaline
Sigmavirgulina tortuosa (Brady, 1881)	Bulimina (Bolivina) tortuosa Brady, 1881	Yes	Infaunal	Hyaline
Sigmoidella Cushman & Ozawa, 1928			Infaunal	Hyaline
Siphonina advena Cushman, 1922			Epifaunal	Hyaline
Siphonina bradyana Cushman, 1927			Epifaunal	Hyaline	A03
Siphonina reticulata (Cžjžek, 1848)	Rotalina reticulata Cžjžek, 1848		Epifaunal	Hyaline
Siphonina tubulosa Cushman, 1924			Epifaunal	Hyaline
Siphouvigerina Parr, 1950			Epi/Infaunal	Hyaline
Sorites orbiculus (Forsskål em Niebuhr, 1775)	Nautilus orbiculus Forsskål, 1775		Epifaunal	Hyaline
Sphaerogypsina globulus (Reuss, 1848)	Ceriopora globulus Reuss, 1848		-	Hyaline
Spirilina vivipara Ehrenberg, 1843			Infaunal	Hyaline
Stilostomella Guppy, 1894			Infaunal	Hyaline
Tretomphaloides concinnus (Brady, 1884)	Discorbina concinna Brady, 1884		-	Hyaline
Trifarina angulosa (Williamson, 1858)	Uvigerina angulosa Williamson, 1858	Yes	Infaunal	Hyaline	B03
Trifarina bradyi Cushman, 1923		Yes	Infaunal	Hyaline
Uvigerina auberiana d'Orbigny, 1839		Yes	Infaunal	Hyaline
Uvigerina mediterranea Hofker, 1932			Infaunal	Hyaline
Uvigerina peregrina Cushman, 1923		Yes	Infaunal	Hyaline
Valvulineria Cushman, 1926			Infaunal	Hyaline
Adelosina mediterranensis (Le Calvez & Le Calvez, 1958)	Quinqueloculina mediterranensis Le Calvez & Le Calvez, 1958		Epifaunal	Porcelaneous
Archaias angulatus (Fichtel & Moll, 1798)	Nautilus angulatus Fichtel & Moll, 1798	Yes	Epifaunal	Porcelaneous	G02
Articulina carinata Wiesner, 1923	Articulina sagra var. carinata Wiesner, 1923		Epifaunal	Porcelaneous
Articulina multilocularis Brady, Parker & Jones, 1888		Yes	Epifaunal	Porcelaneous
Articulina sulcata Reuss, 1850		Yes	Epifaunal	Porcelaneous	G01
Cornuspira involvens (Reuss, 1850)	Operculina envolve Reuss, 1850		Epifaunal	Porcelaneous
Cornuspira planorbis Schultze, 1854			Epifaunal	Porcelaneous
Massilina Schlumberger, 1893			Epifaunal	Porcelaneous
Milionella subrotunda (Montagu, 1803)	Vermiculum subrotundum Montagu, 1803	Yes	Epifaunal	Porcelaneous	B01
Nodobaculariella cassis (d'Orbigny, 1839)	Vertebralina cassis d'Orbigny, 1839		-	Porcelaneous
Peneroplis carinatus d'Orbigny, 1939	Peneroplis (Peneroplis) carinatus d'Orbigny, 1839		Epifaunal	Porcelaneous
Peneroplis pertusus (Forsskål em Niebuhr, 1775)	Nautilus pertusus Forsskål, 1775	Yes	Epifaunal	Porcelaneous
Peneroplis planatus (Fichtel & Moll, 1798)	Nautilus planatus Fichtel & Moll, 1798	Yes	Epifaunal	Porcelaneous	F03
Planispirina auriculata Egger, 1893			Epifaunal	Porcelaneous
Pseudomassilina macilenta (Brady, 1884)	Miliolina macilenta Brady, 1884		Epifaunal	Porcelaneous
Pseudomassilina robusta Lacroix, 1938	Pseudomassilina oblonga var. robusta Lacroix, 1938		Epifaunal	Porcelaneous
Pseudotriloculina patagonica (d'Orbigny, 1839)	Quinqueloculina patagonica d'Orbigny, 1839		Epifaunal	Porcelaneous
Ptychomiliola Eimer & Fickert, 1899			Epifaunal	Porcelaneous
Pyrgo comata (Brady, 1881)	Biloculina comata Brady, 1881		Epifaunal	Porcelaneous
Pyrgo denticuliculata (Brady, 1884)	Biloculina ringens var. denticulata Brady, 1884		Epifaunal	Porcelaneous
Pyrgo depressa (d'Orbigny, 1826)	Biloculina depressa d'Orbigny, 1826	Yes	Epifaunal	Porcelaneous
Pyrgo elongata (d'Orbigny, 1826)			Epifaunal	Porcelaneous
Pyrgo fornasinii Chapman & Parr, 1935	Biloculina sarsi Schlumberger, 1891		Epifaunal	Porcelaneous
Pyrgo inornata (d'Orbigny, 1846)	Biloculina inornata d'Orbigny, 1846		Epifaunal	Porcelaneous
Pyrgo laevis Defrance, 1824			Epifaunal	Porcelaneous
Pyrgo murrhina (Schwager, 1866)	Biloculina murrhina Schwager, 1866	Yes	Epifaunal	Porcelaneous
Pyrgo nasuta Cushman, 1935	Pyrgo nasutus Cushman, 1935		Epifaunal	Porcelaneous
Pyrgo ringens (Lamarck, 1804)	Miliolites ringens Lamarck, 1804		Epifaunal	Porcelaneous
Pyrgo subsphaerica (d'Orbigny, 1839)	Biloculina subsphaerica d'Orbigny, 1839	Yes	Epifaunal	Porcelaneous
Pyrgo williamsoni (Silvestri, 1923)	Biloculina williamsoni Silvestri, 1923		Epifaunal	Porcelaneous
Quinqueloculina agglutinans d'Orbigny, 1839		Yes	Epifaunal	Porcelaneous
Quinqueloculina auberiana d'Orbigny, 1839			Epifaunal	Porcelaneous
Quinqueloculina bosciana d'Orbigny, 1839		Yes	Epifaunal	Porcelaneous
Quinqueloculina bradyana Cushman, 1917			Epifaunal	Porcelaneous
Quinqueloculina candeiana d'Orbigny, 1839	Quinqueloculina candeiana d'Orbigny, 1839	Yes	Epifaunal	Porcelaneous
Quinqueloculina crassicarinata Collins, 1958		Yes	Epifaunal	Porcelaneous
Quinqueloculina cuvieriana d'Orbigny, 1839		Yes	Epifaunal	Porcelaneous	C01
Quinqueloculina imperialis var. porterensis Rau, 1948			Epifaunal	Porcelaneous
Quinqueloculina inaequalis d'Orbigny, 1839			Epifaunal	Porcelaneous
Quinqueloculina laevigata d'Orbigny, 1839		Yes	Epifaunal	Porcelaneous
Quinqueloculina lamarckiana d'Orbigny, 1839		Yes	Epifaunal	Porcelaneous	E03
Quinqueloculina milletti (Wiesner, 1912)			Epifaunal	Porcelaneous
Quinqueloculina patagonica d'Orbigny, 1839			Epifaunal	Porcelaneous
Quinqueloculina philippinensis Cushman, 1921	Quinqueloculina kerimbatica var. philippinensis Cushman, 1921		Epifaunal	Porcelaneous
Quinqueloculina polygona d'Orbigny, 1839			Epifaunal	Porcelaneous
Quinqueloculina seminulum (Linnaeus, 1758)	Serpula seminulum Linnaeus, 1758	Yes	Epifaunal	Porcelaneous	A01
Quinqueloculina subpoeyana Cushman, 1922		Yes	Epifaunal	Porcelaneous
Quinqueloculina sulcata d'Orbigny in Fornasini, 1900			Epifaunal	Porcelaneous
Quinqueloculina tricarinata d'Orbigny, 1839			Epifaunal	Porcelaneous
Quinqueloculina vulgaris d'Orbigny, 1826			Epifaunal	Porcelaneous
Quinqueloculina weaveri Rau, 1948		Yes	Epifaunal	Porcelaneous
Rupertianella rupertiana (Brady, 1881)	Miliolina rupertiana Brady, 1881		Epifaunal	Porcelaneous
Sigmamiliolinella australis (Parr, 1932)	Quinqueloculina australis Parr, 1932	Yes	Epifaunal	Porcelaneous
Sigmoilina obesa Heron-Allen & Earland, 1932			Epifaunal	Porcelaneous
Spiroloculina antillarum d'Orbigny, 1839			Epifaunal	Porcelaneous
Spiroloculina bradyi Barker, 1960			Epifaunal	Porcelaneous
Spiroloculina depressa d'Orbigny, 1826		Yes	Epifaunal	Porcelaneous
Spiroloculina fragilis Uchio, 1960			Epifaunal	Porcelaneous
Spiroloculina ornata d'Orbigny, 1839			Epifaunal	Porcelaneous
Spiroloculina planulata (Lamarck, 1804)	Miliolites planulata Lamarck, 1804		Epifaunal	Porcelaneous
Spirophitalmidium prolixum Loeblich & Tappan, 1994			Epifaunal	Porcelaneous
Spirophitalmidium scabrum Loeblich & Tappan, 1994			Epifaunal	Porcelaneous
Triloculina littoralis Collins, 1958			Epifaunal	Porcelaneous
Triloculina lucernuloides (Ujiié, 1990)	Pyrgo lucernuloides Ujiié, 1990		Epifaunal	Porcelaneous
Triloculina oblonga (Montagu, 1803)	Vermiculum oblongum Montagu, 1803		Epifaunal	Porcelaneous
Triloculina parisa Loeblich & Tappan, 1994			Epifaunal	Porcelaneous
Triloculina tricarinata d'Orbigny in Deshayes, 1832			Epifaunal	Porcelaneous
Triloculina trigonula (Lamarck, 1804)	Miliolites trigonula Lamarck, 1804		Epifaunal	Porcelaneous
Triloculinella chiastocytis Loeblich & Tappan, 1994			Epifaunal	Porcelaneous
Triloculinella pseudooblonga (Zheng, 1980)	Miliolinella pseudooblonga Zheng, 1980		Epifaunal	Porcelaneous
Vertebralina d'Orbigny, 1926		Yes	Epifaunal	Porcelaneous
Vertebrasigmoilina mexicana (Cushman, 1922)	Articulina mexicana Cushman, 1922		Epifaunal	Porcelaneous
Wisnerella auriculata (Egger, 1893)	Planispirina auriculata Egger, 1893		Epifaunal	Porcelaneous	A03
Ammobaculites Cushman, 1910			Infaunal	Agglutinated
Ammoscalaria compressa (Cushman & McCulloch, 1939)	Ammofrondicularia compressa Cushman & McCulloch, 1939		Epi/Infaunal	Agglutinated
Ammosphaeroidina Cushman, 1910			Infaunal	Agglutinated
Bigerina textularioidea (Goës, 1894)	Clavulina textularioidea Goës, 1894	Yes	Infaunal	Agglutinated	A01
Carterina spiculotesta (Carter, 1877)	Rotalia spiculotesta Carter, 1877		Epifaunal	Agglutinated
Clavulina pacifica Cushman, 1924			Infaunal	Agglutinated
Cribrostomoides spiculolegus (Parr, 1950)	Trochammina spiculolega Parr, 1950	Yes	Epifaunal	Agglutinated
Dorothia pseudoturris (Cushman, 1922)	Textularia pseudoturris Cushman, 1922		Infaunal	Agglutinated
Eggerella bradyi (Cushman, 1911)	Verneuilina bradyi Cushman, 1911	Yes	Infaunal	Agglutinated
Eggerelloides Haynes, 1973			Infaunal	Agglutinated
Gaudryina Orbigny, 1839			Infaunal	Agglutinated
Haplophragmoides Cushman, 1910			Epifaunal	Agglutinated
Karrerotextularia flintii (Cushman, 1911)	Textularia flintii Cushman, 1911		Infaunal	Agglutinated
Karrerulina conversa (Grzybowski, 1901)	Gaudryina conversa Grzybowski, 1901	Yes	Infaunal	Agglutinated
Lagenammina Rhumbler. 1911			Infaunal	Agglutinated
Liebusella soldanii (Jones & Parker, 1860)	Lituola nautiloidea var. soldanii Jones & Parker, 1860	Yes	Infaunal	Agglutinated
Paratrochammina globorotaliformis (Zheng, 1988)	Trochammina globorotaliformis Zheng, 1988		Epifaunal	Agglutinated
Pelosina cylindrica Brady, 1884			Epi/Infaunal	Agglutinated
Pseudoclavulina serventyi (Chapman & Parr, 1935)	Clavulina serventyi Chapman & Parr, 1935		Infaunal	Agglutinated
Reophax testaceus Wiesner, 1931	Reophax scorpiurus var. testacea Wiesner, 1931		Infaunal	Agglutinated
Rhizammina algaeformis Brady, 1879		Yes	Sessile	Agglutinated
Sigmoilopsis reuetocollaris Loeblich & Tappan, 1994			Epifaunal	Agglutinated
Sigmoilopsis schlumbergeri (Silvestri, 1904)	Sigmoilina schlumbergeri Silvestri, 1904	Yes	Epifaunal	Agglutinated	G02
Siphoniferoides siphonifer (Brady, 1881)	Textularia siphonifera Brady, 1881		-	Agglutinated
Siphotextularia concava (Karrer, 1868)	Plecanium concavum Karrer, 1868		Epifaunal	Agglutinated
Siphotextularia floridana (Cushman, 1922)	Textularia floridana Cushman, 1922	Yes	Epifaunal	Agglutinated
Spiroplectinella pseudocarinata (Cushman, 1921)	Textularia pseudocarinata Cushman, 1921		Epifaunal	Agglutinated
Subreophax Saidova, 1975			Infaunal	Agglutinated
Textularia agglutinans d’Orbigny, 1839		Yes	Epifaunal	Agglutinated	F01
Textularia calva Lalicker, 1935		Yes	Epifaunal	Agglutinated
Textularia candeiana d'Orbigny, 1839		Yes	Epifaunal	Agglutinated
Textularia foliacea Heron-Allen & Earland, 1915			Epifaunal	Agglutinated
Textularia secasensis Lalicker & McCulloch, 1940			Epifaunal	Agglutinated
Trochammina inflata (Montagu, 1808)	Nautilus inflatus Montagu, 1808		Epifaunal	Agglutinated
Turritellella shoneana (Siddall, 1878)	Trochammina shoneana Siddall, 1878		Infaunal	Agglutinated
* CFC - Cushman Foundation collection

## Sheet: TABLE IV
Relative abundance
Stations	A01	A02	A03	A04	B01	B02	B03	B04	C01	C02	C03	FOZ03	FOZ08	FOZ13	FOZ18	D01	D02	D03	D04	E01	E02	E03	E04	F01	F02	F03	F04	G01	G02	G03
FRAGMENTED PORCELANEOUS Un.ID.		0.808753		0.230164	1.75264		0.354551	0.3276						2.4849			1.17165	3.92638		3.8247		4.79478	0.399002	2.73068			0.875867			0.000856883
JUVENILE PORCELANEOUS Un.ID.	0.254281		0.505212				1.06365	0.317673		0.301375						5.37634	1.17165		0.378457	2.86853	2.52436				5.66748	11.7903	2.33565
Adelosina mediterranensis	2.28853
Adelosina sp.																										0.235806				0.877449
Archaias angulatus (CFC)				0.0125871	0.000978033	0.0178795		0.364828									3.51494	3.51738		5.80677	1.32792	0.727779	1.25935	3.04215	2.56175	4.2141	0.598738	0.0256561	10.8001	0.543264
Archaias sp. (juv.)				0.230164
Archaias spp.				0.000899078				0.980319						0.5522										1.36534	0.0126506		0.291956	2.81484		0.00771195
Articulina carinata								0.317673
Articulina multilocularis (CFC)		0.269584																			1.69277	0.00535131	0.399002	0.273068	1.61928	3.30681			0.204838	1.76604
Articulina scalaris																														0.877449
Articulina sulcata (CFC)													0.177956	0.5522			1.6403	6.21677		16.5737	2.10364	2.0549		9.83045	1.61928	0.707417		22.5187	0.400294
Articulina sp.	0.508562																					0.342484		0.546136	1.61928			4.92596
Cornuspira involvens	0.762843	0.269584	1.26303	0.230164	1.00151	1.43036	2.12731			0.301375															1.21446					1.7549
Cornuspira planorbis			0.126303			0.286072									1.13873	0.179211	0.468658		0.189229							0.707417	0.291956
Cornuspira sp. (juv.)																											0.291956
Edentostomina rupertiana																										0.00184223				0.00257065
Miliolinella subrotunda (CFC)	14.494	8.08753	15.9142	5.06361	9.51431	8.01001	7.09102	4.44742	0.293875	3.31513	0.971685	0.930233	0.889779	0.5522	4.64251		0.702988				0.420727	0.342484		1.09227	0.40482			0.938279		3.50979
Miliolinella spp.		1.07834	0.252606				1.06365								0.262783							0.342484						0.23457	0.200147	0.438724
Peneroplis pertusus (CFC)																				4.46215	4.41764	1.71242		3.00375		1.17903		6.33338	5.00993	0.000856883
Peneroplis planatus (CFC)														0.5522			0.234329	13.0879		0.318725	0.425658			0.819204	4.0482	2.82967			7.80573	3.51665
Peneropolis carinatus																												0.0183258
Peneropolis sp.								0.0372273															0.399002	15.0187	0.40482			8.44817
Peneropolis sp. (juv.)																								0.819204		5.65933
Pseudomassilina macilenta																					0.210364			1.36534		0.235806
Pseudomassilina robusta																												0.23457
Pyrgo comata														0.5522			0.234329			0.63745		0.342484
Pyrgo denticuliculata																								0.273068	0.40482
Pyrgo depressa (CFC)																													0.200147
Pyrgo elongata		0.539169		0.230164											0.613161					0.318725	0.631091	1.02745			0.40482		0.291956
Pyrgo fornasinii (?)								0.0347455											0.00147835
Pyrgo inornata								0.00248182												0.00996016
Pyrgo laevis		0.00105306	0.000493372				0.00276993				1.2184
Pyrgo murrhina (CFC)								0.00496364
Pyrgo nasuta														0.5522									0.0124688			0.235806
Pyrgo ringens								0.317673
Pyrgo subsphaerica (CFC)	1.01712	0.273797	0.00296023	0.00269724			0.354551	0.367309		1.80825	2.92264																	0.703709	0.200147
Pyrgo williamsoni																	0.468658
Pyrgo spp.	0.254281		0.379403					0.00496364										0.654397	0.00147835			0.00535131	0.822943	0.000533336		0.471611	0.0142557
Quinqueloculina auberiana					0.250377
Quinqueloculina bosciana (CFC)					4.00602
Quinqueloculina bradyana																				0.318725				0.819204		0.235806
Quinqueloculina candeiana (CFC)	0.762843		0.378909	0.460328	1.50422		0.709102									1.25448				1.59363	2.96153	0.0321079		5.46136	1.21446	1.88644	0.583912	0.23457
Quinqueloculina crassicarinata (CFC)		1.07834	0.631516	0.690492		0.572144	0.358706	0.00496364		0.301375	1.94337		1.06773	1.3805	0.613161									1.36534	0.80964	0.471611			6.805	1.7549
Quinqueloculina cuvieriana (CFC)	10.3063	1.42585	0.38927	0.00719263	2.06169	6.96406	5.75868	3.21892	46.8454	7.83575	17.3461		6.98476	2.761	0.139604		1.17165			2.26096	5.09146	0.0588645	0.0124688	0.273068		1.91868	0.920915	7.03709	1.23841	4.02135
Quinqueloculina inaequalis			0.126303
Quinqueloculina laevigata (CFC)		1.07834											0.177956	1.3805							0.210364		0.399002	1.09227	1.61928	1.41483				0.000856883
Quinqueloculina lamarckiana (CFC)	3.81422	0.269584			3.50723	4.80064	2.15224	0.335046	7.52135	0.687512	0.0986867		4.47114	9.12856	0.626848	1.07527	4.45226	5.27607		1.2749	4.439	4.4951	0.124688	4.64376	3.24172	2.13515	0.878719	7.50623	10.0167	3.07107
Quinqueloculina milletti	0.508562	0.808753	0.126303
Quinqueloculina patagonica										0.301375																		0.23457
Quinqueloculina philippinensus																				0.63745						0.235806			0.00156365
Quinqueloculina polygona																					0.631091			1.63841		0.235806
Quinqueloculina porterensis																							0.798005
Quinqueloculina seminulum (CFC)	2.28853	0.539169	0.252606	0.230164	0.75113	1.14429	2.12731	0.317673		2.411						0.358423	0.702988	1.63599		0.956175	0.420727	1.71242		0.546136		0.471611		5.3951	1.0023	1.7549
Quinqueloculina subpoeyana (CFC)			0.505212							1.2055					1.05113					2.23108					0.40482	0.707417
Quinqueloculina sulcata			0.126303	0.460328
Quinqueloculina tricarinata					0.250377
Quinqueloculina vulgaris																					0.0131477
Quinqueloculina weaveri (CFC)		0.00210613																2.61759	0.189229	0.956175		1.36994	0.0249377			0.00460558
Quinqueloculina spp.	0.254281	1.34792	0.506693		1.26949	2.94118	1.06365	0.642792	0.00918358	1.50688	0.728763		8.4529	9.97412	3.3149	0.896057	9.256			8.64542	4.69374	5.91855	2.04489	9.29072	0.00316266	0.509377	0.0325029	2.81484	1.84823	2.64177
Quinqueloculina spp. (juv.)																									1.21446
Sigmamiliolinella australis (CFC)			0.757819													0.537634		0.327198			0.210364	2.73987			2.83374		0.291956
Sigmamiliolinella sp.														0.2761
Sigmoilina obesa																											0.00285113
Spiroloculina antillarum				0.000899078																0.0498008	0.00328693			0.000533336	0.00316266			0.47647
Spiroloculina bradyi	0.254281									0.301375																		0.23457
Spiroloculina depressa (CFC)						0.00893975				0.301375					0.0875944		0.0585823				0.210364	0.0107026		0.546136		0.000921116			0.200147
Spiroloculina fragilis								0.317673
Spiroloculina ornata	0.762843								0.587749
Spiroloculina planulata				0.230164							0.00379564
Spiroloculina sp.	0.254281	0.269584		0.230164			0.354551	0.642792	0.293875	0.301375										0.328685							0.000570226	0.23457		0.438724
Spiroloculina sp. (juv.)		0.269584			0.250377
Spirophitalmidium prolixum		0.269584
Spirophitalmidium scabrum			0.126303
Spiroplectinella pseudocarinata			0.252606	0.230164		0.286072
Spiroplectinella sp.							0.354551
Triloculina littoralis																												0.469139
Triloculina lucernuloides	0.254281
Triloculina oblonga							0.354551						0.533867		0.0875944	1.07527				0.63745	1.26218				1.21446	2.12225
Triloculina parisa			1.51564
Triloculina tricarinata														0.2761
Triloculina trigonula										0.301375																	0.293096
Triloculina spp.					0.503687	1.14429									0.262783			0.327198				1.36994			0.40482
Triloculinella chiastocytis			0.252606
Triloculinella pseudoblonga												0.465116			0.437972							0.342484	0.798005				0.583912			1.7549
Vertebralina spp. (CFC)																					0.024652			0.00106667		0.00736893				0.00599818
Vertebrasigmoilina mexicana																				0.966135	0.00657387					0.00644781
Wisnerella auriculata		1.07834	0.252606	0.230164	0.250377	0.858216	1.06365			0.301375					0.350378	0.716846	1.17165	0.327198			0.420727	0.342484			1.21446
Wisnerella sp.				0.460328																										0.438724
FRAGMENTED AGGLUTINATED Un.ID.															2.62783														0.400294
AGGLUTINATED Un.ID				0.00269724				0.320155																	0.0126506	0.00276335	0.0205281	0.703709
BISERIAL AGGLUTINATED Un.ID.					0.250377
Ammobaculites spp.									0.679585												0.00164347
Ammoscalaria compressa											5.13361
Ammosphaeroidina sp.																							0.798005
Bigenerina textularioidea (CFC)	0.27812	0.29907	0.00394697	0.011688	0.250377	3.11103	0.760346	0.411982	18.3488	8.77284	17.8281		0.711823		0.0328479		0.468658	0.0408998			4.84165		0.074813	0.000533336		2.62518	0.0769805		11.6117
Bigenerina sp.																													1.20088
Carterina spiculotesta															0.00273733
Clavulina pacifica																									0.00316266
Clavulina sp.								0.00248182
Cribrostomoides spiculolegus (CFC)																			0.00147835
Dorothia pseudoturris (CFC)						0.0178795				2.71238													0.249377				1.67076
Eggerella bradyi (CFC)	0.254281
Eggerelloides sp.											0.00569346
Gaudryina sp.																						0.342484	0.810474		0.80964
Haplophragmoides spp.																						0.342484
Karrerotextularia flintii																	0.937317
Karrerrulina conversa (CFC)																														0.0231359
Lagenammina sp.																		0.0408998
Liebusella soldanii (CFC)							1.06365	0.0843819																		0.0350024				0.0754057
Liebusella sp.								0.0198546																			0.00912362			0.00342753
Paratrochammina globorotaliformis							0.354551
Pelosina cylindrica																0.179211
Pseudoclavulina serventyi (?)					0.000978033													0.981595				2.73987	1.19701
Pseudoclavulina sp.						0.00893975					0.0132847
Quinqueloculina agglutinans (CFC)				0.230164									3.02525	8.0069	0.78835		6.56122	3.27198		1.61355	0.631091	3.76732	0.810474	1.09494		0.242253	0.291956	0.00366515
Reophax testaceus								1.0647
Reophax spp.						0.286072		0.042191	0.00918358	3.02317												0.00535131								0.877449
Rhizammina algaeformis (CFC)																												0.00366515
Sahulia barkeri (CFC)		0.0136898	0.00838732	0.00269724			0.00138496	0.367309			0.244819		0.0111222		0.11223		0.234329		0.0059134				0.523691				0.632951		10.4076	0.00171377
Sahulia sp.															0.175189
Sigmoilopsis reuetocollaris											0.242921
Sigmoilopsis schlumbergeri (CFC)			0.000986743	0.00629355	0.250377			1.40967	2.94793	1.80825	1.46132					0.358423		1.30879	0.190707		0.420727		1.64589	0.546136		0.235806	0.911792	1.40742	4.40323	1.31617
Sigmoilopsis sp.									0.293875		0.244819
Siphotextularia concava	0.254281
Siphotextularia sp.																											0.291956
Spirotextularia floridana (CFC)							0.354551	2.22371		0.908834	7.53055				2.18986			0.654397					8.77805				5.54716
Stilostomella sp.															0.0875944
Subreophax sp.																										0.000921116
Textularia agglutinans (CFC)		0.00105306						1.27069					2.66934				3.04628	3.59918		5.73705	11.1493	4.45229		12.0155	0.825453	5.67315	0.306211
Textularia calva (CFC)	1.52569				0.250377	1.43036	1.06365		1.46937		3.4009			3.5893	0.0875944	0.358423							0.399002		0.0221386	1.65524	1.45978	5.86424	0.803715	5.70342
Textularia candeiana (CFC)				0.00539447			0.00276993	0.322637	0.00918358	0.00941797	0.020876												0.0124688			0.00184223	0.583912			0.00856883
Textularia foliacea							0.00276993
Textularia secasensis		0.269584
Textularia sp.1 (CFC)	0.00397314		0.00148011					0.00248182
Textularia spp.						0.286072		0.00496364			1.94337				0.27647			0.654397			0.425658	0.342484	0.798005		3.23856	2.83151	0.875867		0.400294	0.438724
Trochammina inflata													0.177956				0.468658								0.40482
Trochammina spp.			0.126303				0.354551			0.60275			0.177956	0.5522				0.327198	0.189229								0.291956
Trochamminoides Un.ID										0.301375
Turritellella shoneana							0.00138496
Turritellella sp.																														0.877449
FRAGMENTED HYALINE CALCAREOUS Un.ID.	3.30565	0.808753	4.29431	0.690492	2.75512	1.15323	3.19096	2.8665	0.0183672	1.2055	0.242921	2.7907						3.27198				0.684968	1.19701			0.00276335	1.75173	0.23457		1.31617
JUVENILE HYALINE CALCAREOUS Un.ID.	1.27141	3.77418	0.378909	1.61115		5.43537	1.4182	2.54138					4.62685	5.2459	10.5113	7.52688	4.21793		2.45997	6.3745	2.94509			4.09602	31.576		4.37934
HYALINE CALCAREOUS Un.ID.		2.69584	5.30473	2.99213	2.25339	1.71643	2.48186			0.301375																		1.17285		3.94852
ROTALIID HYALINE Un.ID.			0.126303							0.301375
Unilocular Forams	1.01712		0.884122	0.920656	1.50226	0.858216	1.06365	0.317673		0.60275		3.72093	0.355911	0.2761	0.262783	1.43369							0.399002		2.0241	1.41483	1.16782	0.23457		1.31617
Alabaminella sp.	0.254281														0.175189
Alassoida schlumbergeri																								0.273068	0.40482	0.707417
Alfredosilvestris pauciloculata			0.126303
Ammonia beccari																												0.938279
Ammonia parkinsoniana (CFC)	1.77997			0.460328			0.709102					3.72093		0.5522														0.938279		8.77449
Ammonia tepida (CFC)												3.25581												1.09227				0.23457
Ammonia sp. (juv.)		0.539169
Ammonia spp.	0.762843	1.07834	0.378909	0.460328	0.500753	1.71643						5.5814				1.07527				1.2749	0.420727			0.819204			0.583912	3.28398
Amphistegina gibbosa (CFC)	0.0913823	0.283274	0.0182547	0.00719263		1.01019	0.173121	0.129055	0.00918358	0.188359	0.085402				0.0711705										0.104368	0.245938	1.20432		0.0109455	0.00257065
Amphistegina lessoni (CFC)								0.00496364										0.408998	0.00147835				2.73067				0.00285113
Amphistegina radiata (CFC)	0.969447	0.606565	0.0162813	0.00359631	0.000978033	7.08922	0.253449	6.90443	6.12545	8.8576	13.8598				0.588525		3.04628	0.981595					0.798005		0.417471	0.015659	2.099			0.0102826
Amphistegina sp. (juv.)	1.77997	0.539169	0.126303	0.230164	1.00151	1.14429	2.12731	0.637828		1.80825					0.437972									0.819204	0.80964	0.471611
Amphistegina spp.		0.269584		0.000899078	0.000978033	0.429108	0.360091	3.08987	0.0642851	0.60275	0.0151826			0.2761	0.0410599					0.956175				0.273068	0.00948797	0.0147379	0.249759	0.00366515	0.400294	0.439581
Amphycorina scalaris					0.250377																	0.342484	0.399002				0.875867
Amphycorina sp.											0.242921			0.2761												0.235806
Astacolus sp.																											0.000570226
Astrononion sp.				0.230164
Bolivina dilatata (CFC)												0.930233			0.175189	0.537634			0.189229							0.235806	0.291956	0.23457
Bolivina doniezi		2.15667	1.26303		2.50377	0.286072	2.48186					0.930233																		0.438724
Bolivina fragilis (CFC)				0.230164				1.58837							0.875944	0.358423			0.946144			0.342484	0.399002				1.45978
Bolivina lowmani (CFC)							0.354551	0.317673				9.76744	0.355911		0.437972	2.68817			0.189229		1.47255					0.235806	0.291956
Bolivina paula (CFC)	1.77997	5.1221	3.41018	10.8177				1.90604		0.301375		0.930233	0.533867	1.1044	0.262783	3.04659	0.234329		0.567686	1.59363	1.05182	0.684968		0.273068			0.583912
Bolivina pseudoplicata (CFC)	1.52569	0.808753	1.38933		0.75113	1.43036				0.301375			0.533867						0.189229								0.875867			0.438724
Bolivina sp. 1		0.808753													0.262783				1.3246								0.291956
Bolivina striatula	1.52569	0.808753	3.15758	2.30164		2.86072	1.77275	3.4944					0.355911	0.5522																1.31617
Bolivina subaenariensis						0.286072	0.709102			0.301375
Bolivina subspinescens (CFC)															0.262783															0.877449
Bolivina vadescens	0.254281							0.317673
Bolivina spp.	0.762843	0.269584	0.505212	0.690492	0.75113		2.12731			0.301375	0.242921	1.86047		1.9327	1.83948	1.6129	0.937317		0.567686	0.318725	0.210364	1.71242		1.36534	4.85784	2.59386	0.291956
Bolivinellina translucens (CFC)		0.539169			0.500753	0.572144		0.635346								0.358423					0.210364					0.471611			0.200147
Borelis melo																									0.40482
Buccella sp.	1.01712							0.635346				0.930233																0.23457
Bulimina aculeata (CFC)																0.537634
Bulimina marginata (CFC)												0.930233				0.179211														0.877449
Bulimina spp.			0.252606																0.189229
Buliminella elegantissima	1.01712				1.00151	0.286072		0.317673												0.318725					0.80964
Buliminella sp.		0.269584		0.230164									0.177956	0.2761
Cancris auricula	0.254281			0.000899078
Cancris oblongus							0.354551			1.2055					0.175189			0.327198				0.342484	0.399002
Cancris sp.							0.709102			0.301375																	0.291956
Cassidulina curvata (CFC)			1.13673			0.286072	2.12731	0.635346		2.411					2.62783		0.468658	0.327198					2.39401				7.2989
Cassidulina laevigata (CFC)	0.254281	1.07834	0.126303		0.500753	0.286072	1.06365	5.40044									0.234329										0.291956
Cassidulina laevis				0.460328	0.250377	0.286072		0.317673			1.45753																			0.438724
Cassidulina sp.		0.539169			0.250377			0.317673														0.342484
Cibicides aknerianus (CFC)	1.01712	1.07834	4.67322		1.75264		3.19096	2.22371		0.301375	1.70045
Cibicides dispars	0.254281		0.631516	5.7541				0.00248182
Cibicides fletcheri (CFC)	4.0685		0.378909	2.99213		2.28858	2.12731	1.58837		0.301375	0.242921	0.465116
Cibicides lobatulus (CFC)		0.539169	0.378909	3.68263	1.50226					1.50688
Cibicides refulgens (CFC)	0.762843	1.88709					1.77275			0.301375																				0.877449
Cibicides variabilis (CFC)	1.27141		0.252606			0.286072	0.354551	0.637828		0.60275	0.728763																		0.200147
Cibicides sp. (juv.)		2.42626			10.2654
Cibicides spp.	2.03822	1.34792	5.68364	2.5318	1.50226	1.71643	1.06365	2.22371		0.60275																	0.000570226		0.400294	1.7549
Cibicidoides cicatricosus (CFC)															0.525567
Cibicidoides mundulus (CFC)			0.252606	0.460328		0.572144				3.01375			0.533867		6.48199	0.896057	4.45226	0.327198	0.567686	0.956175			3.19202	0.819204		0.235806	2.04369
Cibicidoides wuellerstorfi (CFC)		0.269584				0.286072
Cibicidoides spp.	0.508562				0.250377		1.06365							1.6566	1.75189		0.468658	0.654397				1.36994	2.79302	0.273068
Cribroelphidium gunteri					0.250377																							0.23457
Cribroelphidium poeyeanum (CFC)	0.254281	0.269584			1.25188	1.14429																						0.23457	0.400294	0.877449
Cribroelphidium spp.			0.126303									3.25581	1.24569															0.23457
Cyclorbiculina compressa																						0.0160539		0.00373335	0.00316266	0.00368446		0.00366515	0.00938189
Cymbaloporetta atlantica (CFC)															0.262783					0.318725		0.684968				0.235806
Discogypsina viscularis						0.0268192	0.00138496	0.00496364			0.00189782															0.00276335
Discogypsina sp.								0.00248182
Discorbinella bertheloti (CFC)	2.03425	0.269584	6.69407		0.250377	3.43286	0.354551			1.2055		0.465116	0.355911		0.262783	0.179211								0.273068	1.61928	1.88644				2.19362
Discorbinella spp.	0.254281		0.631516	0.230164				0.317673			0.242921				0.0875944
Discorbis bradyi	0.254281
Discorbis malovensis		0.269584
Discorbis peruvianus										0.60275		1.39535																		1.7549
Discorbis valvulatus				2.07148
Discorbis viladeboeanus (CFC)	6.35703	9.43545	0.884122	2.07148	5.50828	1.43036	1.4182	0.635346						0.5522	1.83948	3.58423		0.327198	0.567686	1.2749	1.26218	2.0549	1.19701		1.21446	2.59386
Discorbis williamsoni		0.808753				0.572144	1.06365	0.953019		0.301375		0.930233																0.703709
Discorbis spp.		0.808753				0.572144	0.709102	0.635346		0.60275		0.465116			0.175189										0.40482	4.71611				1.31617
Ehrenbergina spinea								0.635346																			4.37934
Elongobula arethusae		0.269584					0.354551
Elongobula sp.		0.269584
Elphidium advena	0.508562						0.354551														1.26218
Elphidium discoidale (CFC)							0.354551						3.73707	6.0742	0.963539	1.25448	2.34329			1.59363	2.52436	3.42484		1.63841		1.65064
Elphidium excavatum (CFC)	0.508562	0.269584	0.757819	0.690492	2.25339	0.572144	0.709102		0.587749	4.822	2.67213	1.86047		1.1044		2.50896	0.702988	1.96319		1.2749	0.841455	2.0549		0.273068		0.707417		2.34936	3.4025	4.82597
Elphidium galvestonense																												0.23457
Elphidium macellum	0.508562																									0.235806			2.00147
Elphidium sp. (juv.)		0.269584																							2.0241
Elphidium spp.	1.01712	1.07834	0.505212	1.15082	0.75113	0.858216	0.354551	0.635346		0.301375		0.465116						0.327198			0.631091					0.471611		1.17285	0.400294	0.877449
Epistominella exigua (CFC)	0.508562													0.2761
Eponides alabaminaeformis																	0.468658
Eponides cribrorepandus (CFC)	0.0715165	0.0231674	0.0123343		0.000978033		0.0872528	0.00496364	5.04179	0.60275	0.0910954				0.821198						0.00164347		0.473815		0.0126506	0.0101323	0.0273709			0.88259
Eponides repandus (CFC)	0.00397314	0.00105306			0.000978033	0.286072	0.354551	0.0124091		0.0659258	1.45753												0.798005				0.291956			0.0488424
Eponides sp. 1			0.00148011
Eponides sp.		0.00105306	0.000493372	0.000899078		0.286072		0.320155																			0.0222388
Eponides (?) sp.						0.286072		0.635346
Evolvocassidulina sp.			0.252606	0.690492
Floresina sp.							0.354551
Fursenkoina pantoni					0.500753							2.32558																		1.31617
Fursenkoina sp.			0.505212	1.15082		0.286072					0.242921	0.465116			0.175189			0.327198	0.189229			0.684968		0.273068	0.40482	0.943222				0.438724
Gavelinopsis praegeri	0.254281
Gavelinopsis sp.	0.254281
Glabratelina traphera	0.508562	0.808753
Glabratella sp.	0.254281						0.354551
Glandulina sp.																0.179211
Glandulonodosaria sp.			0.126303
Globobulimina pacifica																				0.318725
Globobulimina sp.																		0.327198
Globocassidulina crassa (CFC)	0.508562	1.61751	4.79952	9.66689	3.2549	2.28858	4.60916	7.94183		0.60275		2.32558	5.87254	0.5522	4.90529	8.24373	3.28061		27.2489	3.18725	3.15546	1.36994	5.18703	0.273068	0.40482	0.471611	7.00694			1.7549
Globocassidulina oblonga (CFC)							0.709102	0.635346		0.301375					0.262783	0.179211	0.234329		0.378457								0.875867
Globocassidulina rossensis (CFC)	0.254281	2.42626	4.54691	16.3416	5.50828	5.43537	4.96371	5.08277		1.80825		12.093	6.05049	1.1044	9.3726	21.3262	7.96719	2.29039	56.7686	3.50598	7.78346	4.10981	9.57606		1.21446	0.943222	9.9265
Globocassidulina subglobosa (CFC)	0.254281	1.61751	1.26303	3.91279	0.500753	0.572144	0.709102	3.17673		0.60275			0.355911		1.83948	0.179211	0.468658	0.327198	0.378457	0.318725	0.631091	0.342484	5.58603			1.17903	8.17476	0.23457
Globocassidulina spp.			0.252606		0.250377		0.354551	0.635346				0.930233															0.875867	0.23457
Guttulina sp.																		0.654397				0.342484
Gypsina vesicularis																									0.00316266		0.00285113			0.00171377
Gyroidina spp. (juv.)								0.635346
Gyroidinoides sp. (juv.)			0.378909					1.90604							0.262783	0.358423
Hanzawaia boueana (CFC)	0.762843			0.230164	2.25339	2.57465	1.77275	0.317673	3.52649	3.91788	4.37258	0.465116	32.5659	28.1622	2.89062	3.40502	12.4194	27.1575	0.378457	4.14343	13.0425	27.0562	0.798005	3.27735	3.23856	8.01739		1.17285	15.8116	7.89704
Hanzawaia sp. (+inflate)																0.358423			0.189229		0.210364		1.59601
Hanzawaia sp.							0.354551					0.930233																		0.438724
Haynesina germanica	2.28853	1.07834	2.39976	2.07148	3.00452	1.43036	1.77275	0.953019		0.301375		1.86047						0.654397								1.41483		0.469139		2.19362
Haynesina sp.								0.635346				0.465116										0.684968
Heterolepa bradyi (CFC)			1.26303
Heterolepa sp.							0.354551
Heterostegina depressa										0.00470898															0.0158133
Heterostegina sp.																										0.238569
Hoeglundina elegans																													0.400294	0.440438
Hoeglundina sp. (juv.)								0.317673
Hoeglundina sp.																													0.200147	0.877449
Hopinkisina pacifica																0.179211
Ioanella tumidula (?)		0.00105306
Islandiella australis (CFC)		0.269584
Islandiella spp.																				0.318725						0.471611
Laevidentalina sp.					0.250377				0.293875	0.301375
Lenticulina atlantica (CFC)							0.354551
Lenticulina convergens				0.230164			0.709102								0.00273733		0.234329
Lenticulina gibba																		0.327198	0.0088701			0.00535131
Lenticulina orbicularis (CFC)						0.00893975										0.179211			0.0162618				0.0249377				2.64471
Lenticulina sp. (juv.)						0.286072							0.355911		0.0875944		0.468658
Lenticulina stephensoni (CFC)				0.000899078	0.00391213	0.0178795	0.00553986	0.0173727	1.05611		0.248615										0.00164347						0.589614
Lenticulina vortex (CFC)				0.00359631				0.672573															3.59102				0.879859
Lenticulina spp.		0.269584	0.126303		0.500753			0.337528							0.19435				0.00147835				0.0498753				0.0245197
Lingulina sp.																											0.00342136
Lobatula lobatula		0.269584																0.654397					1.19701
Loxostomum sp.															0.0875944											0.235806
Marginulina sp.																											0.293096
Massilina sp. (juv.)									0.293875
Massilina sp.	0.254281
Melonis barleeanum			0.126303							0.301375					0.175189											1.17903
Melonis sp.																											0.291956	0.469139
Neoconorbina terquemi	1.77997	0.269584	4.0417							0.301375															1.21446
Neoconorbina sp.	0.254281	3.77418						0.00248182						0.5522	0.262783
Neoeponides antillarum (CFC)				0.230164		0.286072		0.317673	0.293875		0.242921				0.613161											0.235806	0.583912
Neoeponides scheiberssi																									0.0126506	0.00829004
Neoeponides sp.						0.286072		0.325119
Neolenticulina sp.	0.254281
Neoponides antillarum	0.00794628	0.0136898	0.0118409	0.0206788	0.0029341	0.232433	0.0166196	0.181173	0.220406	0.014127	0.0246717				0.208037			0.0817996	0.0310453			0.00535131	0.0374065				0.0199579
Nodobaculariella cassis						0.286072
Nonion sp. (juv.)						0.572144
Nonion spp.	0.254281		0.378909				0.709102								0.262783					0.318725					1.21446			0.23457		1.31617
Nonionella atlantica		0.269584	0.126303
Nonionella auris																		1.63599
Nonionella opima														0.2761
Nonionella spp.																0.716846				0.956175		0.342484
Nonionoides grateloupii			0.378909	0.230164	0.250377	0.858216	0.354551	0.317673			0.485842	17.2093	1.77956	2.761	0.525567	4.48029	2.10896	1.63599			1.47255	2.0549			1.21446	1.88644	0.291956	0.23457	0.600441	3.07107
Nonionoides spp.			0.126303														0.702988					0.684968		0.273068
Oridorsalis umbonatus (CFC)																						0.00535131				0.000921116
Paracassidulina nipponensis (CFC)	0.254281	1.88709	0.126303	1.61115			0.354551						0.889779	0.2761	2.97821	1.25448	3.51494	0.327198	0.567686		0.841455	1.02745
Pararotalia cananeiaensis												2.32558
Pararotalia spp.		1.88709	2.27346	1.61115	3.50527	0.858216										0.716846				1.59363	1.68291	1.02745		0.273068
Patellina corrugata		7.27878	1.38933	1.38098	0.75113			0.635346									0.234329													0.438724
Patellina sp.			0.757819
Planispirina auriculata	0.254281
Planispirinella exigua (?)																						0.00535131
Planodiscorbis rarescens					1.00151						0.485842
Planodiscorbis sp.					0.250377
Planoglabratella sp.	0.762843
Planorbulina mediterranensis (CFC)	0.262227	0.00210613	0.00246686	0.00269724				0.00248182		1.50688					0.016424			0.327198	0.00147835				0.0124688		2.04624		0.00855339
Planorbulina spp.								0.00496364							0.78835
Planorbulinella sp. (juv.)							0.354551
Planulina ariminensis (CFC)							0.709102	2.22371		0.60275																			0.200147
Planulina foveolata (CFC)			0.252606	0.920656									0.177956		4.55491	0.179211	1.17165		0.567686			0.342484	6.38404				5.54716
Planulina spp.		0.269584	0.757819	0.690492		0.572144				0.301375	1.94337				1.40151				0.379936				0.399002							0.00171377
Pleurostomella spp.																0.716846
Poroeponides lateralis (CFC)	0.0119194		0.000493372		0.250377	0.0446987		0.322637	2.27753																			2.3457		0.000856883
Poroeponides sp.								0.00496364			0.00189782
Pseudobrizalina lobata				0.230164	0.250377
Pseudobrizalina sp.																						0.342484
Pseudotriloculina patagonica			0.757819	0.690492	0.500753
Ptychomiliola sp.					0.000978033	0.0178795
Pullenia bulloides																									0.40482
Pullenia quinqueloba								0.317673											0.189229								0.583912
Pyrulina gutta										0.60275
Pyrulina sp.						0.286072
Rectobolivina bifrons	0.254281
Rectouvigerina sp.																0.179211
Reussella spinulosa (CFC)	1.52569	0.269584	0.126303			2.86072	0.709102	0.953019	0.881624	4.21925	2.18629			0.2761	0.78835		0.702988	3.59918	0.189229	0.318725	0.631091	0.684968	1.59601			0.235806	0.875867	0.23457	0.200147	0.877449
Rosalina globularis (CFC)	3.81422	2.69584	0.252606	0.474713	2.50377	0.286072	2.48186	0.684983		1.80825		0.465116			0.175189				0.0133051			0.342484	0.0623441	0.000533336			0.00855339	0.703709		3.07107
Rosalina sp.		3.77418	0.252606	2.5318	1.00151	0.286072	1.06365			0.60275	0.728763	0.465116													1.21446					0.438724
Rotorbinella lepida (CFC)					3.75565		0.354551					6.97674	5.33867	0.2761	1.05113	12.1864	4.45226		0.756915	2.23108	4.41764			1.09227		0.943222
Rotorbis auberii		0.269584						0.317673
Rutherfordoides spp.																0.358423
Sagrina pulchella (CFC)																0.179211				0.63745	0.210364				0.80964	0.235806
Seabrookia curta					0.500753	1.43036	0.354551	0.317673		0.301375		2.7907			0.0875944	0.358423										0.235806				0.877449
Sigmavirgulina tortuosa (CFC)						0.858216	0.354551			0.301375					0.0875944	0.179211				0.63745						0.235806	1.16782
Sigmoidella sp.					0.00195607
Siphoniferoides siphonifer																							0.399002
Siphonina advena	0.00397314
Siphonina bradyiana			0.757819	0.230164	0.500753	1.43036	0.709102	0.317673		1.2055	0.485842			0.2761	0.78835		0.234329					0.342484	0.798005	0.819204	0.40482	0.000921116	0.291956	0.469139		0.438724
Siphonina reticulata											0.485842
Siphonina tubulosa	0.508562	0.539169	0.126303	0.230164																						2.12225
Siphonina sp.			0.126303
Siphouvigerina sp.													0.177956
Sorites orbiculus																									0.00316266
Sphaerogypsina globulus	0.00397314					0.00893975	0.00553986	0.00992728		0.014127	0.990663														0.00632531	0.00368446	0.00513204
Sphaerogypsina sp.		0.00105306													0.0875944
Spirilina vivipara		2.69584
Spirilina spp.														0.8283	0.78835											1.17903
Tretomphaloides concinnus						0.286072
Trifarina angulosa (CFC)	0.762843	0.808753	1.26303	0.690492	0.75113		3.90006	5.08277		6.0275	0.485842	1.86047	3.91503	0.5522	9.3726	3.22581	4.45226	1.30879	2.08152	2.23108	1.26218	1.02745	17.9551	0.546136		0.943222	5.83912	0.703709
Trifarina bradyi (CFC)															0.0875944
Trifarina sp.1 (CFC)																0.179211	1.40598							0.273068
Trifarina spp.			0.126303				0.709102						0.177956	0.8283	2.45264	0.358423		0.654397	0.567686			1.02745	3.59102	1.09227
Uvigerina auberiana (CFC)	0.254281														0.175189		0.234329						0.399002
Uvigerina mediterranea																			0.189229								0.583912
Uvigerina peregrina (CFC)				0.460328
Valvulineria spp.										0.301375

## Sheet: TABLE V
> 500 µm - Absolute value
Stations	A01	A02	A03	A04	B01	B02	B03	B04	C01	C02	C03	FOZ03	FOZ08	FOZ13	FOZ18	D01	D02	D03	D04	E01	E02	E03	E04	F01	F02	F03	F04	G01	G02	G03
Depth (m)	25	40	50	150	25	40	50	150	25	40	50	15	30	40	50	25	40	50	150	25	40	50	150	25	40	50	150	25	40	50
Split fraction	1/1	1/1	1/1	1/1	1/1	1/1	1/1	1/1	1/1	1/1	1/1	1/1	1/1	1/1	1/1	1/1	1/1	1/1	1/1	1/1	1/1	1/1	1/1	1/1	1/1	1/1	1/1	1/1	1/1	1/1
FRAGMENTED PORCELANEOUS Un.ID.								1																						1
Archaias angulatus				14	1	2		19										6		7	40	8	5	72	42	223	26	7	123	122
Archaias sp.				1				11																	4					9
Articulina multilocularis																										3			3	3
Articulina pacifica																					21	1		2		11				6
Articulina sulcata																														11
Edentostomina rupertiana																										2				3
Peneroplis pertusus																													2
Peneroplis planatus																					3								2	9
Peneroplis sp.								15																				1
Peneropolis carinatus																												5
Peneropolis lateralis																														1
Porcelanosos quebrados								3
Pyrgo bulloides			4
Pyrgo fornasinii?								14											1
Pyrgo inornata								1												1
Pyrgo laevis		1	1				2				2
Pyrgo murrhina								2
Pyrgo nasuta																							1
Pyrgo spp.			1					2											1			1	2	1			25
Pyrgo subsphaerica		4	2	3				20			4
Quinqueloculina agglutinans																				2			1	5		7		1
Quinqueloculina candeiana																					10
Quinqueloculina crassicarinata							3
Quinqueloculina cuvieriana	34	74	21	8	60	75	62	17	589		52		20		51					3	26	11	1			35	79		24	85
Quinqueloculina laevigata																														1
Quinqueloculina lamarckiana		2			4	25	18	7	19	18	52		2	1	5			1			13	8	10	3	1	14	5		6
Quinqueloculina philippinensus																													1
Quinqueloculina quinquecarinata								2
Quinqueloculina seminulum																													1
Quinqueloculina spp.			3		18	9		3	1				8	2	27		2			4	40	18	4	12	1	41	57		30	11
Quinqueloculina venusta																						6
Quinqueloculina vulgaris																					8
Quinqueloculina weaveri																							2			5
Sigmoilina obesa																											5
Spiroloculina antillarum				1																5	2			1	1			2
Spiroloculina depressa						1											1					2				1
Spiroloculina planulata											2
Spiroloculina spp.								3												1							1
Triloculina spp.					3
Triloculina trigonula																											2
Vertebrasigmoilina mexicana																				1	4					7
AGGLUTINATED Un.ID				3				1																	4	3	36
Ammobaculites spp.									10												1
Ammoscalaria compressa											17								1
Bigenerina textularioidea	6	28	8	13		28	37	38	46	7	50				12			1			2		6	1		34	135		2
Carterina spiculotesta															1
Clavulina pacifica																									1
Clavulina sp.								1
Dorothia pseudoturris						2																	20				370
Eggerelloides sp.											3
Gaudryina sp.																							1
Karrerulina conversa																														27
Lagenammina sp.																		1
Liebusella soldanii								34																		38				88
Liebusella sp.								8																			16			4
Pseudoclavulina serventyi (?)					1
Pseudoclavulina sp.						1					7
Reophax spp.								17	1	2												1
Reophax testaceus								45
Rhizammina algaeformis																												1
Sahulia barkeri		13	17	3			1	20			1		1		41				4				10				86			2
Sigmoilopsis schlumbergeri			2	7				56	1	1	2								1				4				63
Sigmoilopsis sp.											1
Subreophax sp.																										1
Textularia agglutinans		1																						1	5	15	25
Textularia candeiana				6			2	130	1	2	11												1			2				10
Textularia sp.1	1		3					1
Textularia foliacea							2
Textularia calva																									7	5			2
Textularia spp.								2							5						3					2
Turritellella shoneana							1
HYALINE CALCAREOUS Un.ID.					1	1		3	2																	3
Amphistegina gibbosa	23	13	37	8		113	125	52	1	40	45				26										33	11	64		7	3
Amphistegina lessoni								2										2	1				59				5
Amphistegina radiata	116	64	33	4	1	121	183	862	251	25	135				23										4	17	97			12
Amphistegina sp.				1	1	16	4	349	7		8				15										3	16	438	1		1
Amphistegina sp. (juv.)								1
Astacolus sp.																											1
Cancris auricula				1
Cibicides dispars								1
Cibicides spp.	1																										1
Cibicides variabilis								1
Cyclorbiculina compressa																						3		7	1	4		1	6
Discogypsina sp.								1
Discogypsina viscularis						3	1	2			1															3
Elphidium excavatum																												1
Eponides cribrorepandus	18	22	25		1		63	2	69		48				44						1		6		4	11	48			6
Eponides repandus	1	1			1			5		14																				57
Eponides sp. 1			3
Eponides sp.		1	1	1				1																			39
Gypsina vesicularis																									1		5			2
Hanzawaia boueana																								1
Heterostegina depressa										1															5
Heterostegina sp.																										3
Hoeglundina elegans																														2
Ioanella tumidula (?)		1
Lenticulina convergens															1
Lenticulina gibba																			6			1
Lenticulina orbicularis						1													11				2				30
Lenticulina spp.								8							7				1				4				43
Lenticulina stephensoni				1	4	2	4	7	51		3										1						10
Lenticulina vortex				4				15																			7
Lingulina sp.																											6
Marginulina sp.																											2
Neoconorbina sp.								1
Neoeponides scheiberssi																									4	9
Neoeponides sp.								3
Neoponides antillarum	2	13	24	23	3	26	12	73	24	3	13				76			2	21			1	3				35
Oridorsalis umbonatus																						1				1
Planispirinella exigua (?)																						1
Planorbulina mediterranensis	2	2	5	3				1							6				1				1		7		15
Planorbulina sp.								2
Planulina spp.																			1											2
Poroeponides laterialis	3		1			5		2	24
Poroeponides sp.								2			1
Ptychomiliola sp.					1	2
Pullenia bulloides
Rosalina globularis				16				20											9				5	1			15
Sigmoidella sp.					2
Siphonina advena	1
Siphonina bradyiana																										1
Sorites orbiculus																									1
Sphaerogypsina globulus	1					1	4	4		3	10														2	4	9
Sphaerogypsina sp.		1
TOTAL BENTHIC FORAMINIFERA	209	241	191	121	102	434	524	1893	1097	116	468	0	31	3	340	0	3	13	59	24	175	63	148	107	131	532	1801	20	209	478

## Sheet: TABLE VI
500-125 µm - Absolute value
Stations	A01	A02	A03	A04	B01	B02	B03	B04	C01	C02	C03	FOZ03	FOZ08	FOZ13	FOZ18	D01	D02	D03	D04	E01	E02	E03	E04	F01	F02	F03	F04	G01	G02	G03
Depth (m)	25	40	50	150	25	40	150	150	25	40	50	15	30	40	50	25	40	50	150	25	40	50	150	25	40	50	150	25	40	50
Split fraction	1/64	1/256	1/256	1/256	1/256	1/32	1/256	1/128	1/32	1/64	1/128	1/1	1/16	1/16	1/32	1/64	1/4	1/8	1/128	1/32	1/128	1/64	1/32	1/512	1/128	1/256	1/512	1/64	1/128	1/512
FRAGMENTED PORCELANEOUS Un.ID.		2					1										5	12				14	1				3
JUVENILE PORCELANEOUS Un.ID.	1						2	1
Adelosina mediterranensis	9
Adelosina sp.																										1
Archaias angulatus								1									15	10		18	6	2	3	10	3	13	2		53	1
Archaias sp. (juv.)				1
Archaias spp.								3						2										5			1	12
Articulina carinata								1
Articulina multilocularis																					8		1	1	1	12			1	4
Articulina scalaris																														2
Articulina sulcata													1	2			7	19		46	9	6		28		1		96	2
Articulina sp.	2																							2	4			18
Cornuspira involvens		1			1
Cornuspira planorbis			1														1										1
Miliolinella spp.			2				2								3							1							1
Miliolinella subrotunda	21	2			6	4	4		1	9	4		1	2	13		3				2	1		4	1			2
Peneroplis pertusus																				14	21	5		11		5		27	25
Peneroplis planatus														2			1	40			1			3	2	12			26	8
Peneropolis sp.																							1	55	1			36
Pseudomassilina macilenta																					1			5		1
Pyrgo comata														2			1			2		1
Pyrgo denticuliculata																								1	1
Pyrgo depressa																													1
Pyrgo elongata		2		1											7					1	3	3			1		1
Pyrgo laevis											5
Pyrgo nasuta														2												1
Pyrgo ringens								1
Pyrgo spp.	1		3															2					2			2
Pyrgo subsphaerica	4	1					1	1		6	12																	3	1
Pyrgo williamsoni																	2
Pyrulina gutta										2
Quinqueloculina bradyana																								3		1
Quinqueloculina candeiana																					10			9			2
Quinqueloculina crassicarinata							1			1	8		1	5										5	2	2			34	2
Quinqueloculina cuvieriana	31	5			3	22		10	141	24	71						3			7	17					8	3	20	6	1
Quinqueloculina cuvieriana							16						38	10			2				7			1						4
Quinqueloculina laevigata														5							1			2		2
Quinqueloculina lamarckiana	7	1			12	16	2	1	25				24	33	3	2	15	16		4	21	13		11	3	6	3	30	49	2
Quinqueloculina patagonia										1
Quinqueloculina philippinensis																				2						1
Quinqueloculina polygona																					3			6		1
Quinqueloculina porterensis																							2
Quinqueloculina seminulum	5					2		1		7							2	4		3	1	3		2		2		19	5	1
Quinqueloculina spp.		2				4	2	1		3	3		47	36	37		39			27	22	15	3	34		2		11	9	4
Quinqueloculina spp. (juv.)																									3
Quinqueloculina subpolygona										4										7
Quinqueloculina weaveri																		8	1	3		3
Sigmamiliolinella australis			6																								1
Spiroloculina antillarum																												2
Spiroloculina bradyi										1																		1
Spiroloculina depressa										1					1						1			2					1
Spiroloculina ornata	3								2
Spiroloculina sp.	1							1	1											1								1		1
Spirophitalmidium prolixum		1
Spiroplectinella pseudocarinata			2	1		1
Spiroplectinella sp.							1
Triloculina littoralis																												2
Triloculina lucernuloides	1
Triloculina oblonga							1								1										3	1
Triloculina spp.																									1
Triloculina tricarinata														1
Triloculina trigonula										1																	1
Triloculinella pseudooblonga																							2				2
Vertebrasigmoilina mexicana																				3
Wisnerella auriculata						1	1			1							1	1
FRAGMENTED AGGLUTINATED Un.ID.															30														2
AGGLUTINATED Un.ID								1																				3
Ammobaculites sp.									2
Ammoscalaria compressa											21
Ammosphaeroidina sp.																							2
Bigenerina sp.																													6
Bigerina textularioidea	1	1			1	10	2	1	61	29	73		4				2				23					11			58
Dorothia pseudoturris										9																	5
Eggerella bradyi	1
Gaudryina sp.																						1	2		2
Karrerotextularia flintii																	4
Pelosina cylindrica																1
Pseudoclavulina serventyi (?)																		3				8	3
Quinqueloculina agglutinans				1									15	28	6		27	10		5	3	11	2	4		1	1
Rectobolivina bifrons	1
Reophax spp.						1				10																				2
Reophax testaceus								3
Sahulia barkeri								1			1						1						1				2		52
Sahulia sp.															2
Sigmoilopsis reuetocollaris											1
Sigmoilopsis schlumbergeri								4	10	6	6							4	1		2		4	2		1	3		22	3
Sigmoilopsis sp.									1		1
Siphotextularia concava	1
Siphotextularia sp.																											1
Spirotextularia floridana							1	7		3	31				25			2					22				19
Textularia agglutinans								4					15				13	11		18	52	13		35	2	7
Textularia calva	6					5	3		5		14			13	1	2							1			7	5	23	4	7
Textularia candeiana																											2
Textularia secasensis		1
Textularia spp.						1					8				3			1			2	1	2		6	12	3		2
Trochammina inflata													1				1								1
Trochammina spp.			1				1			2
Trochamminoides Un.ID										1
Turritellella sp.																														2
FRAGMENTED HYALINE CALCAREOUS Un.ID.	4		3	2	2	1	2	1		1	1							10				2	3				6	1		3
JUVENILE HYALINE CALCAREOUS Un.ID.							3						2				2			7
ROTALIID HYALINE Un.ID.			1							1
Unilocular Forams						1	2			1				1	2											2				1
Alabaminella sp.															2
Alfredosilvestris pauciloculata			1
Ammonia beccari																												4
Ammonia spp.																				2								1
Ammonia tepida																								4
Amphistegina gibbosa		1																								1	4
Amphistegina lessoni																		1					5
Amphistegina radiata	2	2				21		15	13	29	56				6		13	3					2		1		7
Amphistegina sp. (juv.)			1	1			1			3															2
Amphistegina spp.		1				1	1	7		1				1						3				1					2	1
Amphycorina scalaris																						1	1				3
Amphycorina sp.											1			1												1
Bolivina fragilis				1
Bolivina spp.										1	1				1		2										1
Borelis melo																									1
Buccella sp.																												1
Bulimina marginata																1
Cancris oblongus										4					2			1				1	1
Cancris sp.							2			1																	1
Cassidulina curvata			5				4			7					25		2	1					5				19
Cassidulina laevigata		2						15									1
Cassidulina laevis					1	1					6
Cassidulina sp.																						1
Cibicides aknerianus			1				1	6			7
Cibicides dispars	1
Cibicides fletcheri						3	3	3			1
Cibicides lobatulus					3					5
Cibicides refulgens	1
Cibicides sp.	3			1		2		2		1																			1
Cibicides variabilis	3		1			1				1	3																		1
Cibicidoides cicatricosus															6
Cibicidoides mundulus			2	2						10					48		18						7	1		1	6
Cibicidoides spp.					1		1							6	20		1	2				2	7	1
Cibicidoides wuellerstorfi		1				1
Cribroelphidium gunteri																												1
Cribroelphidium poyeanum	1				2	4																						1	2	1
Cribroelphidium spp.													7
Cymbaloporetta atlantica															3					1		2				1
Discorbinella bertheloti		1	4		1	1	1			1					3	1
Discorbinella sp.											1				1
Discorbis spp.										2					2										1
Discorbis viladeboanus		3	7		1		1									1						2			3
Discorbis williamsoni										1
Ehrenbergina spinea								1																			15
Elphidium advena	2																				6
Elphidium discoidale							1						19	22	11	7	9			4	12	10		6		5
Elphidium excavatum		1	1		3	2			2	13	11			4		5	2	6		3	4	6		1		1		2	16	6
Elphidium macellum	2																									1			10
Elphidium spp.					1	1		1		1								1										3	1	2
Epistominella exigua	2
Eponides (?) sp.						1		2
Eponides alabaminaeformis																	2
Eponides cribrorepandus									15	2					8								1							2
Eponides repandus						1	1				6												2				1
Floresina sp.							1
Fursenkoina sp.											1
Gavelinopsis praegeri	1
Gavelinopsis sp.	1
Glabratellina traphera	1	2
Glandulina sp.																1
Globobulimina pacifica																				1
Globobulimina sp.																		1
Globocassidulina oblonga																	1
Globocassidulina sp.								1																			3
Globocassidulina subglobosa				15				5		1					13							1	14				21
Guttulina sp.																		2				1
Gyroidina sp. (juv.)								2
Gyroidinoides sp. (juv.)			3
Hanzawaia boueana	1			1	3	9	4	1	12	9	18	1	150	100	21	3	48	82	2	9	58	77		5		10		1	76	8
Hanzawaia sp.																														1
Hanzawaia sp. (+inflate)																2			1		1		4
Haynesina germanica			1		2																							2
Heterostegina sp.																										1
Hoeglundina elegans																													2
Hoeglundina sp.																													1
Hoeglundina sp. (juv.)								1
Islandiella australis		1
Laevidentalina sp.					1				1	1
Lagena laevis																														1
Lagena striatula												1
Lenticulina atlantica							1
Lenticulina convergens				1													1
Lenticulina gibba																		1
Lenticulina orbicularis																1											9
Lenticulina spp.								1							2
Lenticulina stephensoni									2		1																2
Lenticulina vortex								2															9				3
Liebusella soldanii							3
Lobatula lobatula		1																2					3
Loxostomum sp.																										1
Marginulina sp.																											1
Massilina sp.	1
Massilina sp. (juv.)									1
Melonis barleeanum			1							1					2											2
Melonis sp.																											1	2
Neocorbina terquemi		1								1
Neoeponides antillarum				1		1		1	1		1				7											1	2
Neoeponides sp.						1		1
Nodobaculariella cassis						1
Nonion spp.			1				1								3										1			1		1
Nonionella atlantica			1
Nonionella auris																		5
Nonionella spp.																1				3		1
Nonionoides grateloupii			1		1	1	1	1			2	1	8	10		6	9	4			4	6			3	4	1	1	2	2
Nonionoides spp.			1																					1
Pararotalia spp.																				1		2		1
Planodiscorbis rarescens											2
Planodiscorbis sp.					1
Planoglabratella sp.	3
Planorbulina mediterranensis	1									5								1							5
Planorbulina spp.															9
Planulina ariminensis								5		2																			1
Planulina foveolata			2	4									1		48		5						16				16
Planulina spp.						1					8				16				2				1
Poroeponides lateralis					1			1	7																			10
Pullenia bulloides																									1
Pullenia quinqueloba								1											1								1
Reussella spinulosa	6	1				10	2	3	3	14	9			1	9		3	11	1	1	3	2	4			1	2		1	1
Rosalina globularis	14	2	2	1		1	1			6					2													1
Rosalina sp.			2							1	3														3
Rotorbinella lepida							1										1
Sagrina pulchella																										1
Siphoniferoides siphonifer																							1
Siphonina bradyiana			1			1	1	1		4	2			1	9		1						1	1			1			1
Siphonina reticulata											2
Siphonina sp.			1
Siphonina tubulosa	2	2	1	1																						5
Sphaerogypsina globulus											4
Sphaerogypsina sp.															1
Trifarina angulosa		1					2	8		10	2			2	19	5	6	4	2		1		11
Trifarina bradyi															1
Trifarina sp.1																1	4							1
Trifarina spp.							1								28			1	1
Uvigerina auberiana															2								1
Uvigerina mediterranea																			1
Valvulineria sp.										1
TOTAL BENTHIC FORAMINIFERA	148	42	60	35	47	135	84	131	306	263	408	3	334	292	464	40	276	282	13	196	305	218	153	264	58	152	187	338	476	75

## Sheet: TABLE VII
125-63 µm - Absolute value
Stations	A01	A02	A03	A04	B01	B02	B03	B04	C01	C02	C03	FOZ03	FOZ08	FOZ13	FOZ18	D01	D02	D03	D04	E01	E02	E03	E04	F01	F02	F03	F04	G01	G02	G03
Depth (m)	25	40	50	150	25	40	50	150	25	40	50	15	30	40	50	25	40	50	150	25	40	50	150	25	40	50	150	25	40	50
Split fraction	1/64	1/256	1/256	1/256	1/256	1/32	1/256	1/128	1/32	1/64	1/128	1/1	1/16	1/16	1/32	1/64	1/4	1/8	1/128	1/32	1/128	1/64	1/32	1/512	1/128	1/256	1/512	1/64	1/128	1/512
FRAGMENTED PORCELANEOUS Un.ID.		1		1	7			1						9						12				10
JUVENILE PORCELANEOUS Un.ID.			4				1			1						30	5		2	9	12				14	50	8
Adelosina sp.																														2
Articulina multilocularis		1																							3	2
Articulina sp.																						1						3
Articulina sulcata																				6	1			8	4	2
Cornuspira involvens	3		10	1	3	5	6			1															3					4
Cornuspira planorbis						1									13	1	1		1							3
Cornuspira sp. (juv.)																											1
Miliolinella sp.		4					1																					1		1
Miliolinella subrotunda	36	28	126	22	32	24	16	14		2		2	4		40													2		8
Peneroplis planatus																				1	1				8
Peneropolis sp. (juv.)																								3		24
Pseudomassilina robusta																												1
Quinqueloculina auberiana					1
Quinqueloculina bosciana					16
Quinqueloculina bradyana																				1
Quinqueloculina candeiana	3		3	2	6		2									7				5	4			11	3	8		1
Quinqueloculina crassicarinata		4	5	3		2							5		7															2
Quinqueloculina cuvieriana	9		3		5					2																		10		4
Quinqueloculina inaequalis			1
Quinqueloculina laevigata		4											1										1	2	4	4
Quinqueloculina lamarckiana	8				2		4			2			1		4	4	4							6	5	3		2	1	5
Quinqueloculina milletti	2	3	1
Quinqueloculina patagonica																												1
Quinqueloculina seminulum	4	2	2	1	3	2	6			1						2	1	1			1	2						4		3
Quinqueloculina spp.	1	3	4		5	6	1	1		2						5						2	2					1		2
Quinqueloculina subpoeyana			4												12										1	3
Quinqueloculina sulcata			1	2
Quinqueloculina tricarinata					1
Quinqueloculina weaveri																						1
Sigmamiliolinella australis																3		1			1	8			7
Sigmamiliolinella sp.														1
Spiroloculina bradyi	1
Spiroloculina fragilis								1
Spiroloculina planulata				1
Spiroloculina sp.		1		1			1	1		1
Spiroloculina sp. (juv.)		1			1
Spirophitalmidium scabrum			1
Triloculina oblonga													3			6				2	6					8
Triloculina parisa			12
Triloculina spp.					2	4									3			1				4
Triloculinella chiastocytis			2
Triloculinella pseudooblonga												1			5							1								4
Wisnerella auriculata		4	2	1	1	2	2								4	4	4				2	1			3
Wisnerella sp.				2																										1
BISERIAL AGGLUTINATED Un.ID.					1
Haplophragmoides spp.																						1
Paratrochammina globorotaliformis							1
Quinqueloculina agglutinans													2	1	3		1
Sigmoilopsis schlumbergeri					1											2												6
Stilostomella sp.															1
Textularia agglutinans																					1			9		17	1
Textularia calva					1																							2		6
Textularia spp.																		1							2					1
Trochammina inflata																	1
Trochammina spp.													1	2				1	1								1
FRAGMENTED HYALINE CALCAREOUS Un.ID.	9	3	31	1	9	3	7	8		3		6
JUVENILE HYALINE CALCAREOUS Un.ID.	5	14	3	7		19	1	8					24	19	120	42	16		13	13	14			15	78		15
HYALINE CALCAREOUS Un.ID.		10	42	13	9	6	7			1																		5		9
Unilocular Forams	4		6	4	6	1				1		7	2		1	8							1		5	4	4	1		1
Alabaminella sp.	1
Alassoida schlumbergeri																								1	1	3
Ammonia parkinsoniana	7			2			2					8		2														4		19
Ammonia parkinsoniana																														1
Ammonia sp. (juv.)		2
Ammonia spp.	3	4	3	2	2	6						12				6				2	2			3			2	13
Ammonia tepida												7																1
Amphicoryna scalaris					1
Amphistegina sp.										1
Amphistegina sp. (juv.)	7	2			4	4	5	2		3					5									3		2
Archaias angulatus																								1	3	4
Astrononion sp.				1
Bolivina dilatata												2			2	3			1							1	1	1
Bolivina doniezi		8	10		10	1	7					2																		1
Bolivina fragilis								5							10	2			5			1	1				5
Bolivina lowmani							1	1				21	2		5	15			1		7					1	1
Bolivina paula	7	19	27	47				6		1		2	3	4	3	17	1		3	5	5	2		1			2
Bolivina pseudoplicata	6	3	11		3	5				1			3						1								3			1
Bolivina sp. 1		3													3				7								1
Bolivina spp.	3	1	4	3	3		6					4		7	20	9	2		3	1	1	5		5	12	11
Bolivina striatula	6	3	25	10		10	5	11					2	2																3
Bolivina subaenariensis						1	2			1
Bolivina subspinescens															3															2
Bolivina vadescens	1							1
Bolivinellina translucens		2			2	2		2								2					1					2			1
Buccella sp.	4							2				2
Bulimina aculeata																3
Bulimina marginata												2																		2
Bulimina spp.			2																1
Buliminella elegantissima	4				4	1		1												1					2
Buliminella sp.		1		1									1	1
Cancris auricula	1
Cancris oblongus							1
Cassidulina curvata			4			1	2	2		1					5								1				6
Cassidulina laevigata	1	2	1		2	1	3	2																			1
Cassidulina laevis				2				1																						1
Cassidulina sp.		2			1			1
Cibicides aknerianus	4	2	36		7
Cibicides aknerianus		2					8	1		1
Cibicides dispars			5	25
Cibicides fletcheri	16		3	13		5	3	2		1		1
Cibicides lobatulus		2	3	16	3
Cibicides refulgens	2	7					5			1																				2
Cibicides sp. (juv.)		9			41
Cibicides spp.	5	5	45	10	6	4	3	5		1																			1	4
Cibicides variabilis	2		1				1	2		1
Cibicidoides mundulus						2							3		26	5	1	1	3	3			1	2			1
Cibicidoides spp.	2						2										1					2
Cribroelphidium gunteri					1
Cribroelphidium poeyeanum		1			3																									1
Cribroelphidium sp.			1									7																1
Discorbinella bertheloti	8		49			11				3		1	2											1	4	8				5
Discorbinella spp.	1		5	1				1
Discorbis bradyi	1
Discorbis malovensis		1
Discorbis peruvianus										2		3																		4
Discorbis spp.		3				2	2	2				1														20				3
Discorbis valvulatus				9
Discorbis viladeboeanus	25	32		9	21	5	3	2						2	21	19		1	3	4	6	4	3			11
Discorbis williamsoni		3				2	3	3				2																3
Ehrenbergina spinea								1
Elongobula arethusae		1					1
Elongobula sp.		1
Elphidium advena							1
Elphidium discoidale													2				1			1						2
Elphidium excavatum	2		5	3	6		2			3		4				9	1			1						2		8	1	5
Elphidium galvestonense																												1
Elphidium sp. (juv.)		1																							5
Elphidium spp.	4	4	4	5	2	2	1	1				1									3					2		2	1
Epistominella exigua														1
Eponides sp.						1		1
Evolvocassidulina sp.			2	3
Fursenkoina pantoni					2							5																		3
Fursenkoina sp.			4	5		1						1			2			1	1			2		1	1	4				1
Glabratelina traphera	1	1
Glabratella sp.	1						1
Glandulonodosaria sp.			1
Globocassidulina crassa	2	6	38	42	13	8	13	25		2		5	33	2	56	46	14		144	10	15	4	13	1	1	2	24			4
Globocassidulina oblonga							2	2		1					3	1			2								3
Globocassidulina rossensis	1	9	36	71	22	19	14	16		6		26	34	4	107	119	34	7	300	11	37	12	24		3	4	34
Globocassidulina spp.			2		1		1	1				2																1
Globocassidulina subglobosa	1	6	10	2	2	2	2	5		1			2		8	1	2	1	2	1	3					5	7	1
Gyroidinoides sp. (juv.)								6							3	2
Hanzawaia boueana	2				6		1			4			33	2	12	16	5	1		4	4	2	2	7	8	24		4	3	10
Hanzawaia sp.							1					2
Haynesina germanica	9	4	18	9	10	5	5	3		1		4						2								6				5
Haynesina sp.								2				1										2
Heterolepa bradyi			10
Heterolepa sp.							1
Hoeglundina elegans																														1
Hoeglundina sp.																														2
Hopinkisina pacifica																1
Islandiella spp.																				1						2
Lagena laevis			1
Lagena sp.						1	1	1
Lenticulina convergens							2
Lenticulina sp. (juv.)						1							2		1		2
Lenticulina spp.		1	1		2
Loxostomum sp.															1
Melonis barleeanum																										3
Neoconorbina sp.	1	14												2	3
Neoconorbina terquemi	7		32																						3
Neolenticulina sp.	1
Nonion sp. (juv.)						2
Nonion spp.	1		2				1													1					2					2
Nonionella atlantica		1
Nonionella opima														1
Nonionella spp.																3
Nonionoides grateloupii			2	1		2						36	2		6	19		1			3					4			1	5
Nonionoides spp.																	3					2
Paracassidulina nipponensis	1	7	1	7			1						5	1	34	7	15	1	3		4	3
Pararotalia cananeiaensis												5
Pararotalia sp.		7	18	7	14	3										4				4	8	1
Patellina corrugata		27	11	6	3			2									1													1
Patellina sp.			6
Planispirina auriculata	1
Planodiscorbis rarescens					4
Planorbulinella sp. (juv)							1
Planulina costata							2	2
Planulina foveolata															4	1			3			1					3
Planulina spp.		1	6	3		1				1
Pleurostomella spp.																4
Pseudobrizalina lobata				1	1
Pseudobrizalina sp.																						1
Pseudotriloculina patagonica			6	3	2
Pullenia quinqueloba																											1
Pyrulina sp.						1
Rectouvigerina sp.																1
Reussella spinulosa			1																								1	1		1
Rosalina globularis	1	7			10			2
Rosalina globularis		1		1			6					1										1						2		7
Rosalina sp.		14		11	4	1	3			1		1																		1
Rotorbinella lepida					15							15	30	1	12	68	18		4	7	21			4		4
Rotorbis auberii		1						1
Rutherfordoides spp.																2
Sagrina pulchella																1				2	1				2
Seabrookia curta					2	5	1	1		1		6			1	2										1				2
Sigmavirgulina tortuosa						3	1			1					1	1				2						1	4
Siphonina bradyiana			5	1	2	4	1															1	1	2	1			2
Siphonina tubulosa																										4
Siphouvigerina sp.													1
Spirilina spp.														3	9											5
Spirilina vivipara		10
Tretomphaloides concinnus						1
Trifarina angulosa	3	2	10	3	3		9	8		10		4	22		88	13	13		9	7	5	3	34	2		4	20	3
Trifarina sp.1																	2
Trifarina spp.			1				1						1	3		2		1	2			3	9	4
Uvigerina auberiana	1																1
Uvigerina mediterranea																											2
Uvigerina peregrina				2
TOTAL BENTHIC FORAMINIFERA	242	328	731	399	352	201	196	169	0	67	0	212	226	70	667	518	150	22	515	117	169	73	93	102	188	270	152	88	9	152
