# Supplementary material for: From river mouth to reef: benthic foraminifera assemblages reveal ecological dynamics in a mixed carbonate–siliciclastic Brazilian continental shelf
Source: Copernicus journal article supplement (doi:10.5194/jm-44-633-2025), 2025-12-08
Supplement: Supplementary file [file jm-44-633-2025-supplement-title-page.pdf › jm-44-633-2025-supplement-title-page.pdf]

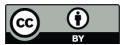

*Supplement of*

**From river mouth to reef: benthic foraminifera assemblages reveal ecological dynamics in a mixed carbonate–siliciclastic Brazilian continental shelf**

**André R. Rodrigues et al.**

*Correspondence to:* André R. Rodrigues ([andre.rosch.rodrigues@gmail.com](mailto:andre.rosch.rodrigues@gmail.com))

- [jm-44-633-2025-supplement-title-page.pdf](#)
- [Supplementary\\_Material-1.xlsx](#)

The copyright of individual parts of the supplement might differ from the article licence.
